# Supplementary material for: Conjugated polymer electrodes fabricated using rylene-based acceptors toward high energy and power density symmetric supercapacitors operable in an organic electrolyte environment
Source: Royal Society of Chemistry journal article supplement (doi:10.1039/d4ta03711a), 2024-01-01
Supplement: d4ta03711a1.pdf [file d4ta03711a1.pdf]

**Conjugated Polymer Electrodes Fabricated Using Rylene-Based Acceptors Toward High Energy and Power Density Symmetric Supercapacitor Operable in Organic Electrolyte Environment**

*Subir K. Pati<sup>1</sup>, Dhananjaya Patra<sup>1,\*</sup>, Sunita Muduli<sup>2</sup>, Sabyashachi Mishra<sup>2</sup>, Sungjune Park<sup>1,\*</sup>*

<sup>1</sup>School of Chemical Engineering, Sungkyunkwan University, Suwon, Republic of Korea

<sup>2</sup>Department of Chemistry, Indian Institute of Technology, Kharagpur-721302, India

\*Corresponding author email: [itspilu@gmail.com](mailto:itspilu@gmail.com), [sungjunepark@skku.edu](mailto:sungjunepark@skku.edu)

| CONTENTS                                                                                                                                                                                          | Page No. |
|---------------------------------------------------------------------------------------------------------------------------------------------------------------------------------------------------|----------|
| <b>1. Experimental Details</b>                                                                                                                                                                    | 4-5      |
| <b>2. Computational Details</b>                                                                                                                                                                   | 6        |
| <b>3. Electrochemical measurements</b>                                                                                                                                                            | 6-7      |
| Scheme 1. Synthetic routes of the monomers                                                                                                                                                        | 8        |
| Scheme 2. Synthesis of <b>BT-NDI/PDI</b> -based polymers                                                                                                                                          | 9        |
| Synthesis of monomers                                                                                                                                                                             | 10       |
| General procedure for the synthesis of <b>BT-NDI/PDI</b> -based polymers                                                                                                                          | 11       |
| <b>Supplementary Figure S1.</b> <sup>1</sup> H- and <sup>13</sup> C-NMR spectra of monomer M2 in CDCl <sub>3</sub> .                                                                              | 12       |
| <b>Supplementary Figure S2.</b> <sup>1</sup> H- and <sup>13</sup> C-NMR spectra of monomer M3 in CDCl <sub>3</sub> .                                                                              | 13       |
| <b>Supplementary Figure S3.</b> <sup>1</sup> H- NMR spectra of Polymer (a) <b>BT-NDI</b> and (b) <b>BT-PDI</b> CDCl <sub>3</sub>                                                                  | 14       |
| <b>Supplementary Figure S4.</b>                                                                                                                                                                   | 15       |
| (a) Gel permeation chromatography (GPC) molecular weight ( $M_w$ ) of the copolymer BT-NDI                                                                                                        | 16       |
| (b) Gel permeation chromatography (GPC) molecular weight ( $M_w$ ) of the copolymer BT-PDI                                                                                                        |          |
| <b>Supplementary Figure S5.</b> TGA thermograms of copolymers <b>BT-NDI</b> , and <b>BT-PDI</b> under N <sub>2</sub> flow at 10 °C min <sup>-1</sup> .                                            | 17       |
| <b>Supplementary Table T1.</b> Summary of literature survey on similar types of n-type polymer based supercapacitor materials                                                                     | 18       |
| <b>Supplementary Table T2.</b> Distribution of individual elements (Wt% and Atomic %) from HRTEM EDS                                                                                              | 19       |
| (b) Comparison of distribution of individual elements (Atomic %) from HRTEM EDS and Calculation                                                                                                   | 19       |
| <b>Supplementary Figure S6.</b> The $C_{dl}$ values for ECSA study, showing the corresponding linear fits of <b>BT-NDI</b> and <b>BT-PDI</b>                                                      | 20       |
| <b>Supplementary Figure S7.</b> The geometry-optimized structures of <b>BT-NDI</b> in (a) monomeric and (c) dimeric forms and <b>BT-PDI</b> in (b) monomeric and (d) dimeric forms, respectively. | 21       |

|                                                                                                                                                                                                                                                               |    |
|---------------------------------------------------------------------------------------------------------------------------------------------------------------------------------------------------------------------------------------------------------------|----|
| <b>Supplementary Figure S8.</b> Dihedral angles between the repeating units of the dimers of the <b>BT-NDI</b> and <b>BT-PDI</b> series                                                                                                                       | 21 |
| <b>Supplementary Table T3.</b> Dihedrals of the optimized geometries of (a) <b>BT-NDI</b> and (b) <b>BT-PDI</b> dimers.                                                                                                                                       | 22 |
| <b>Supplementary Figure S9.</b> The HOMO-LUMO energy diagrams of the monomeric units of (a) <b>BT-NDI</b> and (b) <b>BT-PDI</b> moieties, dimeric units of (c) <b>BT-NDI</b> and (d) <b>BT-PDI</b> moieties.                                                  | 23 |
| <b>Supplementary Table T4.</b> The HOMO and LUMO energy levels and the HOMO-LUMO energy gap (eV) for monomer, dimer, and trimer of <b>BT-NDI</b> and <b>BT-PDI</b> .                                                                                          | 24 |
| <b>Supplementary Figure S10.</b> NTO of the monomers and dimers of the <b>BT-NDI</b> and <b>BT-PDI</b> series                                                                                                                                                 | 25 |
| <b>Supplementary Table T5.</b> The absorption maxima ( $\lambda_{\max}$ ) corresponds to the characteristic UV-Vis absorption calculated from the TD-DFT method for the monomer, dimer, and trimer of <b>BT-NDI</b> and <b>BT-PDI</b> .                       | 25 |
| <b>Supplementary Figure S11.</b> Normalized UV-vis absorption spectra of <b>BT-NDI</b> and <b>BT-PDI</b>                                                                                                                                                      | 26 |
| <b>Supplementary Table T6.</b> Optical and electrochemical properties of <b>BT-NDI</b> and <b>BT-PDI</b> .                                                                                                                                                    | 27 |
| <b>Supplementary Figure S12.</b> (a) CV at 100 mV s <sup>-1</sup> scan rate, (b) GCD at 1 A g <sup>-1</sup> current density for the individual monomer units of BT, NDI and PDI, (c) Effect of applied current/potential on the monomeric working electrodes. | 28 |
| <b>Supplementary Figure S13.</b> (a) CV curves at different scan rates and (b) GCD curves at varying current densities for the <b>BT-NDI</b> polymeric electrode                                                                                              | 29 |
| <b>Supplementary Figure S14</b> Proposed plausible pseudocapacitive charge storage mechanism                                                                                                                                                                  | 30 |
| <b>References</b>                                                                                                                                                                                                                                             | 31 |

## **1. EXPERIMENTAL DETAILS**

### **1.1 Reagents and Materials**

All chemicals and solvents were purchased in reagent grade from Aldrich, ACROS, and TCI, except the catalysts Pd(PPh<sub>3</sub>)<sub>4</sub>, and Pd<sub>2</sub>(dba)<sub>2</sub> which were obtained from Strem Chemicals. Tetrahydrofuran was dried and purified by fractional distillation over sodium/benzophenone and handled in a moisture-free atmosphere. Chlorobenzene was used for the polymerization was received from Aldrich which is protected by sure seal paced with N<sub>2</sub>. Purification of the intermediates by column chromatography techniques using silica gel (Merck, Kieselgel 60 63-200 MYM SC). The monomers M1 <sup>[S1]</sup> were synthesized by our group previously presented in scheme 1 and other two monomers M2 <sup>[S2]</sup> and M3 <sup>[S3]</sup>, were synthesized by a slightly modified procedure as reported in the literatures.

### **1.2 General information - Equipment and procedural details**

#### **1.2.1 Nuclear magnetic resonance spectroscopy (NMR)**

<sup>1</sup>H and <sup>13</sup>C NMR spectra were recorded from CDCl<sub>3</sub> solutions using a Bruker AVANCE 400 MHz spectrometer at a temperature of 298 K; chemical shifts are reported as δ values (ppm), for <sup>1</sup>H-NMRs referenced to the residual solvent peaks (δ: 7.26 for CDCl<sub>3</sub>) and <sup>13</sup>C-NMRs, spectra were referenced to the residual solvent peaks (δ: 77.16 for CDCl<sub>3</sub>).

#### **1.2.2 Thermogravimetric analysis (TGA)**

The thermogravimetric analysis (TGA) was conducted by Q400 (WATERS, USA) for all the co-polymers which exhibited high thermal stability and the thermal decomposition temperature (T<sub>d</sub>) at 5% weight loss are all above 350 °C.

#### **1.2.3 Gel permeation chromatography (GPC)**

Gel permeation chromatography (GPC) was obtained from the Waters (Alliance e2695) model to determine the molecular weights of both the copolymers.

#### **1.2.4 Ultraviolet-visible spectroscopy**

UV–Vis absorption spectra were recorded using Hewlett Packard (mode: HP 8453) absorption spectrometer from dilute solutions in chloroform or from solid films that had been spin-coated onto glass substrate from dilute chloroform solutions ( $5 \text{ mg mL}^{-1}$ ).

#### **1.2.5 Cyclic voltammetry for energy levels measurement**

The electrochemical measurements were carried out in a deoxygenated solution of 0.1 M tetrabutylammoniumhexafluorophosphate (TBAPF<sub>6</sub>) in acetonitrile with a computer-controlled electrochemical workstation (Amtek VersaSTAT 3 instrument (AMETEK Scientific, USA)). A glassy carbon electrode, a Pt wire, and an Ag/AgCl electrode were used as the working, counter, and reference electrodes, respectively. The corresponding energy levels of the highest occupied molecular orbital (HOMO) and lowest unoccupied molecular orbital (LUMO) were calculated from the experimental values of  $E_{\text{ox/onset}}$  and  $E_{\text{red/onset}}$  for the solid films **BT-NDI** and **BT-PDI**, formed by drop-casting films at a similar thickness (ca.  $5 \text{ mg mL}^{-1}$  in chloroform). The onset potentials were determined from the intersections of two tangents drawn at the rising currents and background currents of the CV measurements.

#### **1.2.6 X-ray diffraction (XRD)**

XRD measurement of the polymer powders were conducted on a Bruker D8 Powder diffractometer using Cu X-ray tube (2.2 KW) with maximum voltage 40 kV and power 40 mA in with the  $2\theta$  of  $3^\circ$  to  $30^\circ$ .

#### **1.2.7 Field emission scanning electron microscopy (FESEM)**

Field emission type scanning electron microscope (FE-SEM, Hitachi, S-4700) was used for the morphology analysis of the powder polymeric samples.

#### **1.2.8 Field Emission transmission electron microscopy (FETEM)**

The elemental mapping and distribution of individual elements (Wt% and Atomic %) was calculated from the EDS mapping taken JEOL (JEM-ARM200F) Cs corrected-Field Emission Transmission Electron Microscope.

## 2. Computational Details

The ground state geometries of the BT-based conducting oligomers (monomer to trimer) i.e., **BT-NDI** and **BT-PDI** featuring dual acceptor moieties were optimized to understand their electronic properties by employing the density functional theory <sup>[S4]</sup> (DFT) method with the 6-31G(d, p)<sup>[S5,S6]</sup> basis set and the B3LYP<sup>[S7]</sup> functional along with the polarized continuum (PCM) model of implicit solvation. The TD-DFT calculations were performed at the same level of theory and with the CAM-B3LYP <sup>[S8]</sup> functional. The shorter and longer alkyl substituents of the polymer structure were replaced by methyl and ethyl groups, respectively for the simplification purpose. The vibrational frequencies were identified by performing Hessian calculations on the stationary points attained after achieving self-consistent field convergence. The wave functions extracted from the Gaussian 16 software <sup>[S9]</sup> were utilized to analyze the frontier molecular energy levels and band gap of the oligomers, whereas NTO and MESP analyses were conducted using the Multiwfn 3.8<sup>[S10]</sup> and VMD software 1.9.1.<sup>[S11]</sup>

## 3. Electrochemical measurements

### 3.1 Electrode Fabrication

All electrochemical measurements were conducted using an Amtek VersaSTAT 3 instrument (AMETEK Scientific, USA). The slurry for the working electrode was prepared by mixing the polymeric electrode materials (**BT-NDI** and **BT-PDI**, respectively), conducting carbon black and polyvinylidene difluoride (PVDF) binder with a weight ratio of 75:15:10, using 1,2-dichlorobenzene (DCB) as the solvent. The working electrodes were prepared by drop casting method over pre-activated carbon cloth (CC) substrates with a mass loading of approximately 2 mg/cm<sup>2</sup>.

### 3.2 Formulas used

The specific capacitance was calculated from the GCD curves using Equation S1:

$$C_s = \frac{(I \times \Delta t)}{(m \times \Delta V)} \quad (S1)$$

where  $C_s$ ,  $I/m$ ,  $\Delta t$ , and  $\Delta V$  denote the specific capacitance (F g<sup>-1</sup>), applied current density (A g<sup>-1</sup>), discharge time (s), and potential window of the charge–discharge curve, respectively.

For a symmetric supercapacitor device, multiplication by a factor of two (specific capacitance contribution from both electrodes) in SI Equation 1 is performed considering the mass loading of both the electrodes in the single cell used, as shown in Equation S2:

$$C_s = 2 \times \frac{(I \times \Delta t)}{(m \times \Delta V)} \quad (\text{S2})$$

The energy density, E, and power density, P, of the two-electrode systems are calculated using Equation S3 and S4.

$$\text{Energy density (Wh kg}^{-1}\text{)} = \frac{C_s(\Delta V)^2}{7.2} \quad (\text{S3})$$

$$\text{Power density (W kg}^{-1}\text{)} = \frac{E}{\Delta t \times 3600} \quad (\text{S4})$$

**Scheme 1. Synthetic routes of the monomers (M1–M3)**

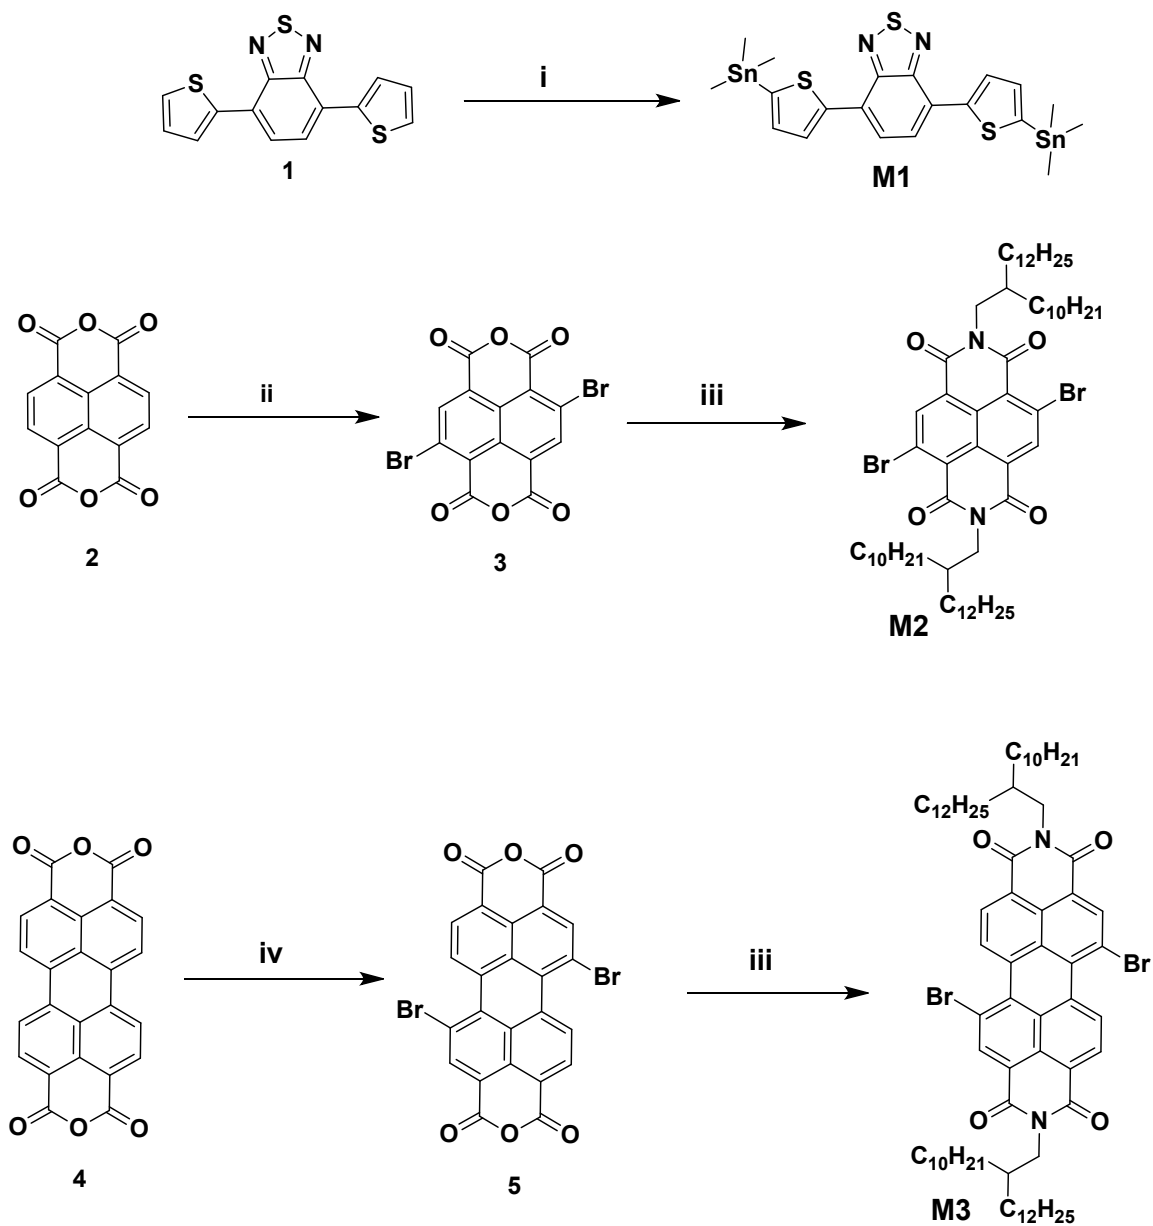

Reagents and conditions: (i) THF, n-BuLi, -78 °C, 2,2,6,6-tetramethylpiperidine (TMP) (ii) DBI, oleum, (iii) 2- 2-decyltetradecan-1-amine, o-Xylene, Propionic Acid, 140 °C; (iv) Br<sub>2</sub>, H<sub>2</sub>SO<sub>4</sub>, 85 °C.



## Scheme 2. Synthesis of BT-diimide based polymers (BT-NDI and BT-PDI)

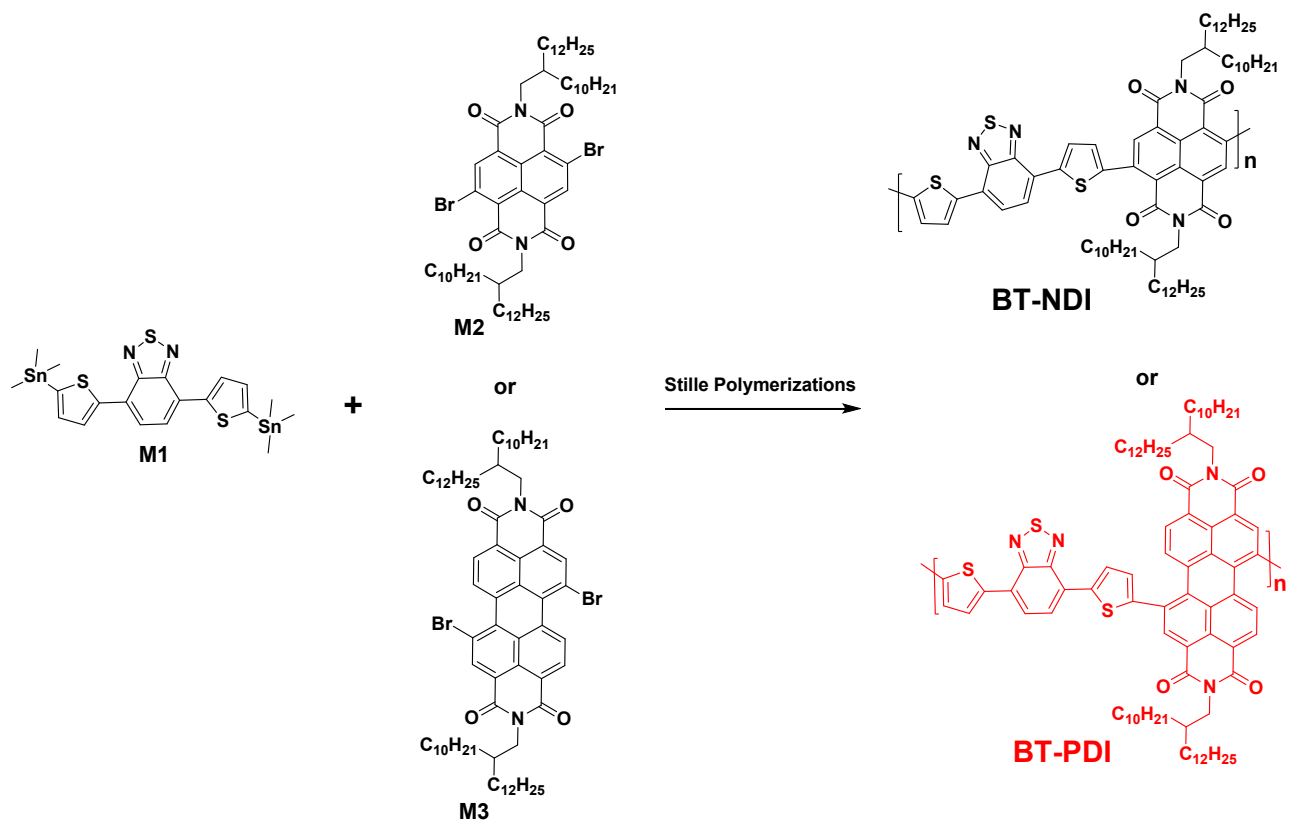

Stille polymerization conditions: P(*o*-tolyl)<sub>3</sub>, CuI, Pd<sub>2</sub>(dba)<sub>3</sub>, and chlorobenzene at 130 °C for 24 hr.

## Synthesis of monomers

### **N,N'-bis(2-decyltetradecyl)-2,6-dibromonaphthalene-1,4,5,8-bis(dicarboximide) (M2)**

To a flame dried a two neck round bottom flask charged compound 3 (2.0 g, 4.69 mmol), 2-2-decyltetradecan-1-amine<sup>x</sup> (4.98 g, 14.08 mmol), o-xylene (1 mL), and propionic acid (5 mL), the resulting mixture was stirred at 140 °C for 2 h. After cooling to room temperature, the solvents were removed in vacuo, and the residue was purified by column chromatography on silica gel with a mixture of chloroform:hexane (1:2, v/v) as eluent. The resulting product was a slight yellow solid with a yield of 1.95 g, 38%. <sup>1</sup>H-NMR (400 MHz, CDCl<sub>3</sub>, δ) 8.98 (s, 2H), 4.14 (d, *J* = 4 Hz, 2H), 1.98 (m, 2H), 1.48-1.22 (m, 68H), 0.88-0.84 (m, 12H). <sup>13</sup>C-NMR (100 MHz, CDCl<sub>3</sub>, δ) 161.18, 161.03, 139.17, 128.38, 127.25, 125.29, 124.08, 45.45, 36.47, 31.93, 31.55, 30.04, 29.70, 29.67, 29.66, 29.61, 29.38, 29.36, 26.34, 22.70, 14.14. Elemental analysis calculated for [C<sub>62</sub>H<sub>100</sub>Br<sub>2</sub>N<sub>2</sub>O<sub>4</sub>]: C, 67.86; H, 9.19; N, 2.55. Obtained: C, 67.52; H, 9.10, N, 2.52.

### **5,12-dibromo-2,9-bis(2-decyltetradecyl)anthra[2,1,9-def:6,5,10-d'e'f']diisoquinoline-1,3,8,10(2H,9H)-tetraone (M3)**

To the mixture of compound 4 (2.1 g, 3.81 mmol), 2-2-decyltetradecan-1-amine<sup>x</sup> (4.05 g, 11.45 mmol), o-xylene (12 mL), and propionic acid (4 mL) was stirred in a two neck round bottomed flask at 140 °C for 2 h. Later in the reaction was cooling to room temperature, the solvents were removed in vacuo, and the residue was purified by column chromatography on silica gel with a mixture of chloroform:hexane (1:1, v/v, gradually up to 3:2) as eluent, resulting a red solid powder (0.63 g, 1.91 mmol, yield 74.7%). <sup>1</sup>H-NMR (400 MHz, CDCl<sub>3</sub>, δ) 9.49 (d, *J* = 8.0 Hz, 2H), 8.87 (s, 2H), 8.65 (d, *J* = 8.0 Hz, 2H), 4.12 (d, *J* = 7.2 Hz, 4H), 2.0-1.98 (m, 2H), 1.57-1.30 (m, 68H), 0.86-0.82 (m, 12H). <sup>13</sup>C-NMR (100 MHz, CDCl<sub>3</sub>, δ) 163.18, 16.69, 1338.06, 132.86, 130.02, 129.20, 128.44, 126.95, 123.18, 122.75, 120.81, 44.89, 36.68, 31.91, 31.88, 31.76, 31.72, 30.05, 29.74, 29.59, 29.32, 26.51, 26.50, 22.67, 14.11. Elemental analysis calculated for [C<sub>72</sub>H<sub>104</sub>Br<sub>2</sub>N<sub>2</sub>O<sub>4</sub>]: C, 70.80; H, 8.58; N, 2.29. Obtained: C, 70.72; H, 8.51; N, 2.21.

### General procedure for the synthesis of BT-NDI/PDI-based polymers:

A 20 mL clean and dry microwave vial was charged with monomer M1, monomer M2 (0.150 mmol), or M3 (0.150 mmol), Pd<sub>2</sub>(dba)<sub>3</sub> (0.005 g, 0.005 mmol), P(*o*-tolyl)<sub>3</sub> (0.006 g, 0.02 mmol), and CuI (0.004 g, 0.02 mmol). The sealed microwave vial was subjected to three cycles of vacuum and purged with N<sub>2</sub>, followed by the addition of chlorobenzene (5 mL) at 130 °C for 24 h. After cooling to room temperature, the reaction mixture was added dropwise to a mixture of hydrochloric acid (1 N, 10 mL) and methanol (200 mL), and stirred for 2 h. The polymer precipitate was filtered through a thimble and purified by Soxhlet extraction with methanol, acetone, hexane, dichloromethane, and chloroform for 24 h. The chloroform-soluble fraction was concentrated and reprecipitated into methanol, filtered, and dried under a vacuum to obtain the desired polymers as dark solid powders.<sup>[S12]</sup>

**BT-NDI**                      *Poly-{2,7-bis(2-decyltetradecyl)-4-methyl-9-(5-(7-(5-methylthiophen-2-yl)benzo[c][1,2,5]thiadiazol-4-yl)thiophen-2-yl)benzo[lmn][3,8]phenanthroline-1,3,6,8(2H,7H)-tetraone}*: Using monomer M1 (94 mg), M2 (164 mg), yield: 123.3 mg, 65%, GPC: M<sub>w</sub> = 24.9 K Da, Đ = 1.68.

**BT-PDI**                      *Poly-{2,9-bis(2-decyltetradecyl)-5-methyl-13-(5-(7-(5-methylthiophen-2-yl)benzo[c][1,2,5]thiadiazol-4-yl)thiophen-2-yl)anthra[2,1,9-def:6,5,10-d'e'f']diisoquinoline-1,3,8,10(2H,9H)-tetraone}*: using monomer M1 (94 mg) and M3 (183 mg), yield: 130 mg, 71% GPC: M<sub>w</sub> = 39.5 K Da, Đ = 1.66.

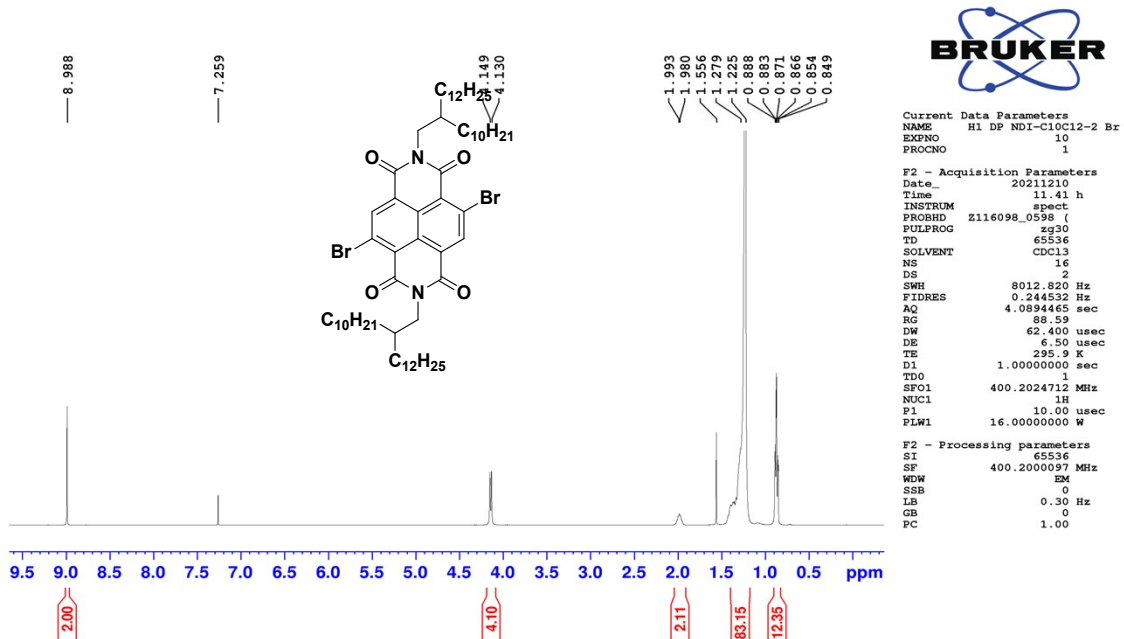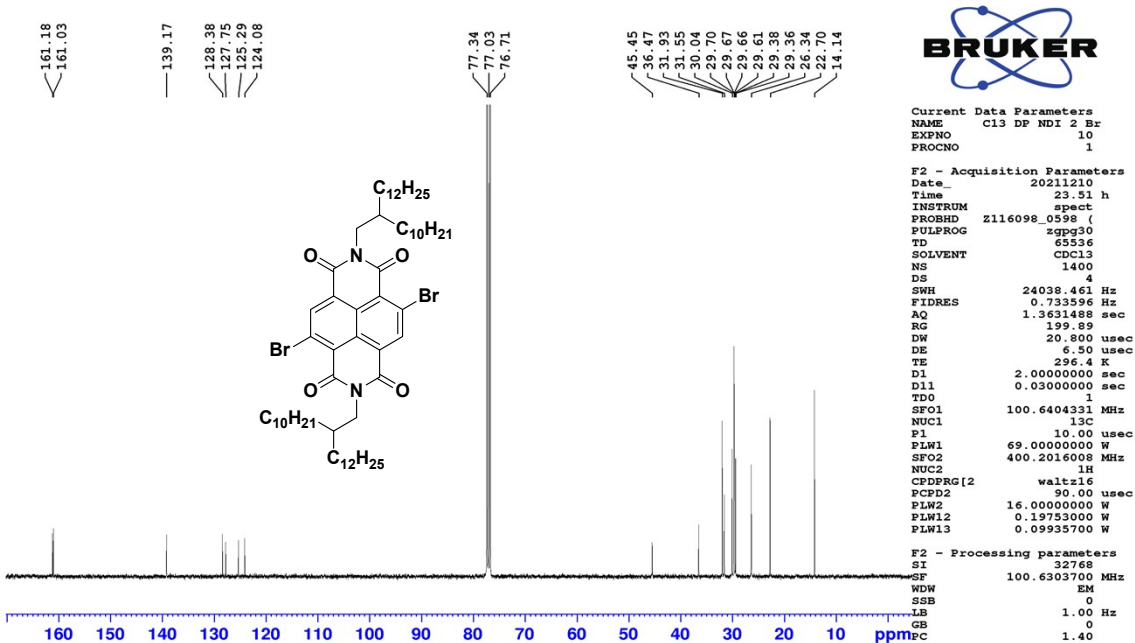

Supplementary Figure S1. <sup>1</sup>H- and <sup>13</sup>C-NMR spectra of monomer M2 in CDCl<sub>3</sub>.

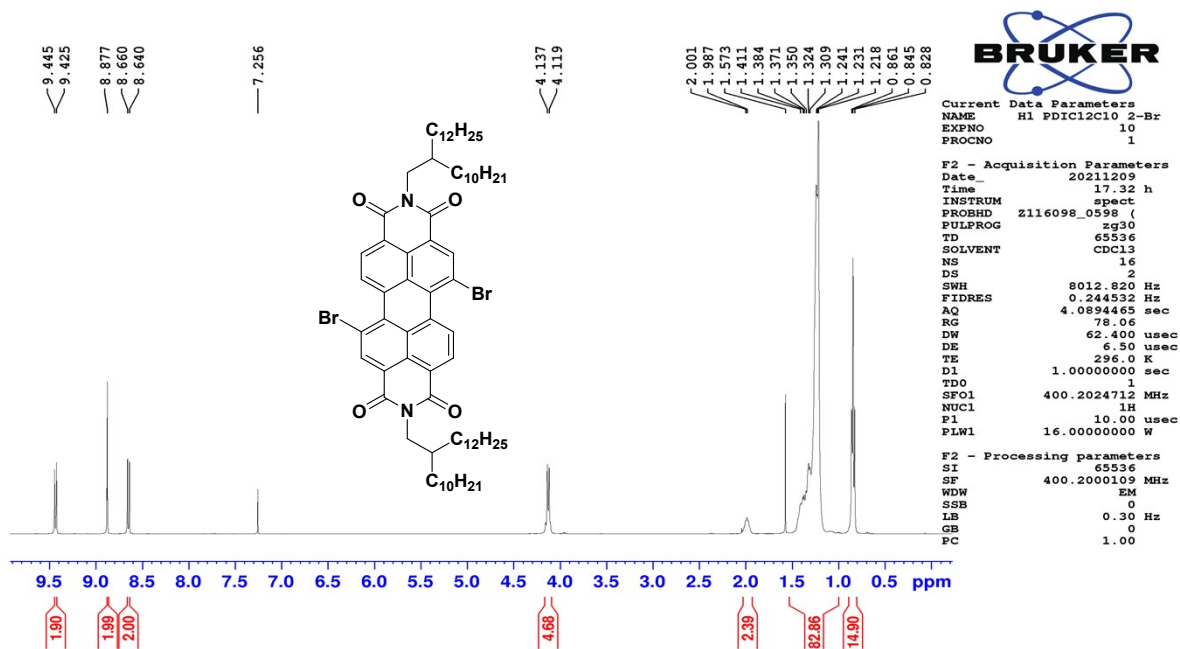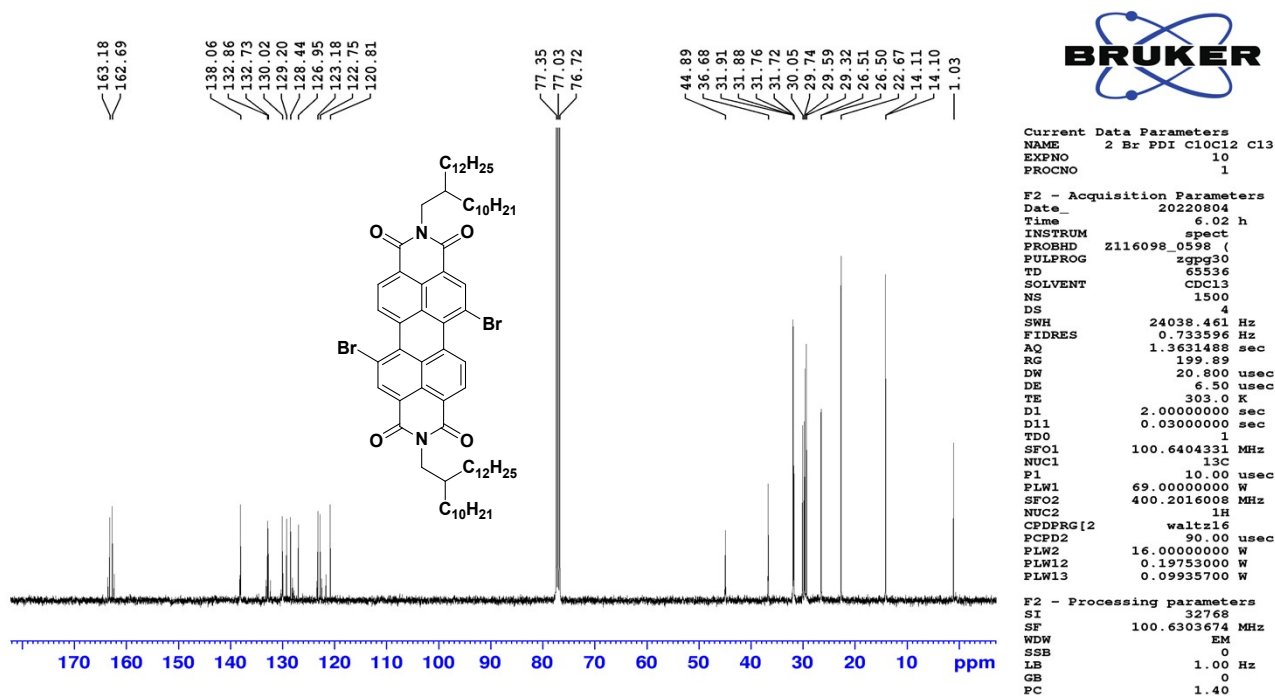

Supplementary Figure S2. <sup>1</sup>H- and <sup>13</sup>C-NMR spectra of monomer M3 in CDCl<sub>3</sub>.

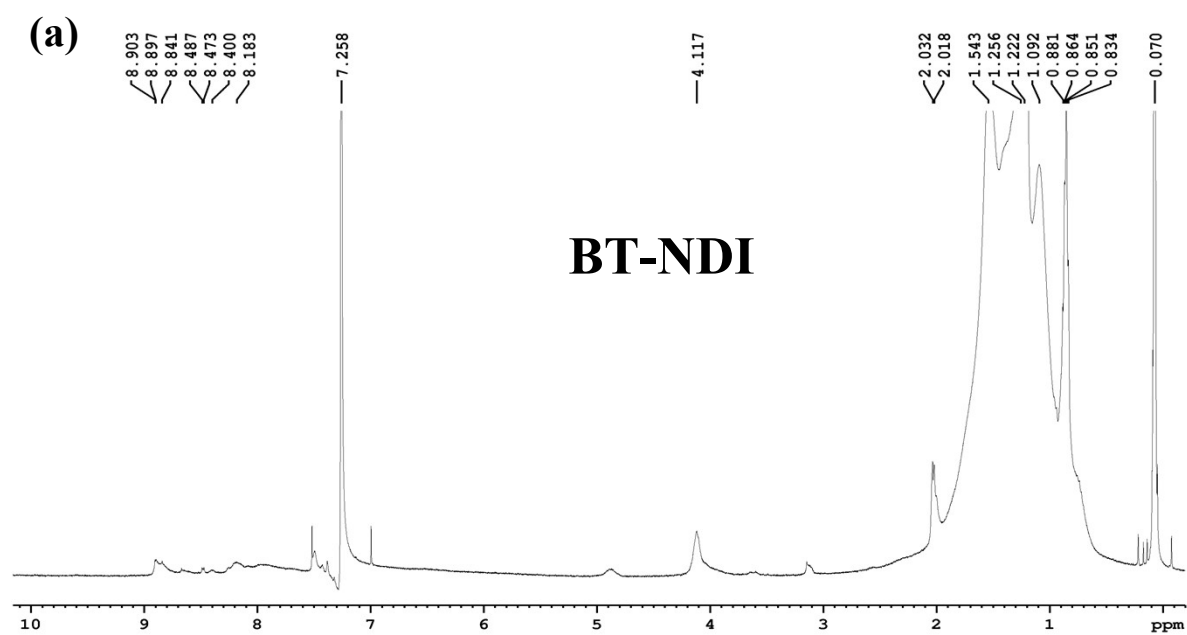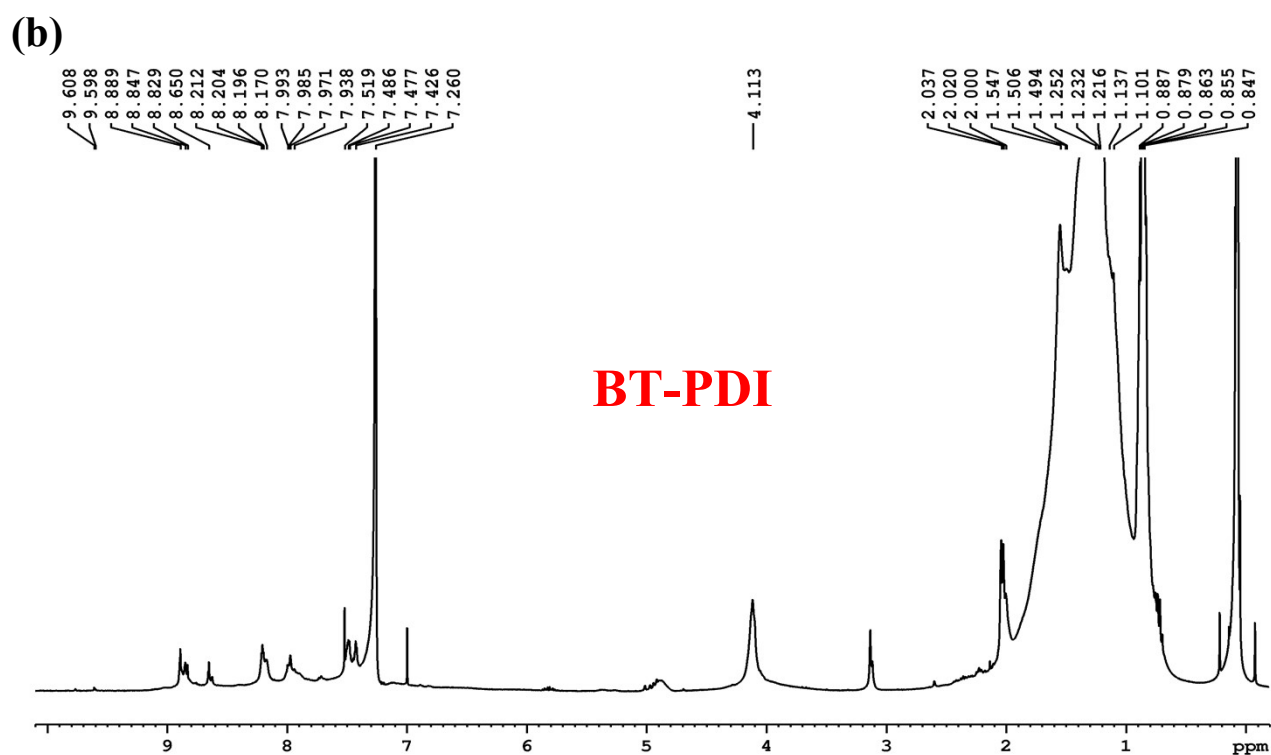

**Supplementary Figure S3.**  $^1\text{H}$ - NMR spectra of Polymer (a) **BT-NDI** and (b) **BT-PDI**  $\text{CDCl}_3$ .

## SAMPLE INFORMATION

|              |               |                   |                         |
|--------------|---------------|-------------------|-------------------------|
| Sample Name: | BT-NDI        | Acquired By:      | System                  |
| Sample Type: | Broad Unknown | Sample Set Name:  | 240229                  |
| Vial:        | 22            | Acq. Method Set:  | Test                    |
| Injection #: | 1             | Injection Volume: | 100.00 ul               |
| Run Time:    | 50.0 Minutes  | Date Acquired:    | 3/1/2024 9:35:58 AM KST |

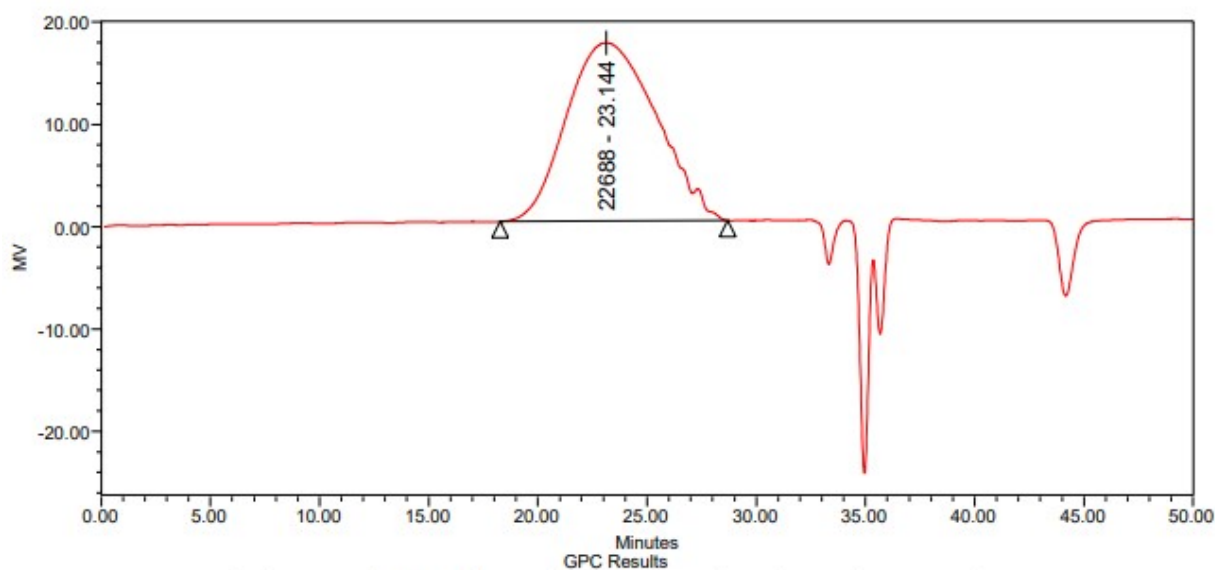

Minutes  
GPC Results

| Dist Name | Retention Time (min) | % Area | % Height | Mn    | Mw    | MP    | Polydispersity |
|-----------|----------------------|--------|----------|-------|-------|-------|----------------|
| 1         | 23.144               | 100.00 | 100.00   | 14825 | 24906 | 22688 | 1.680010       |

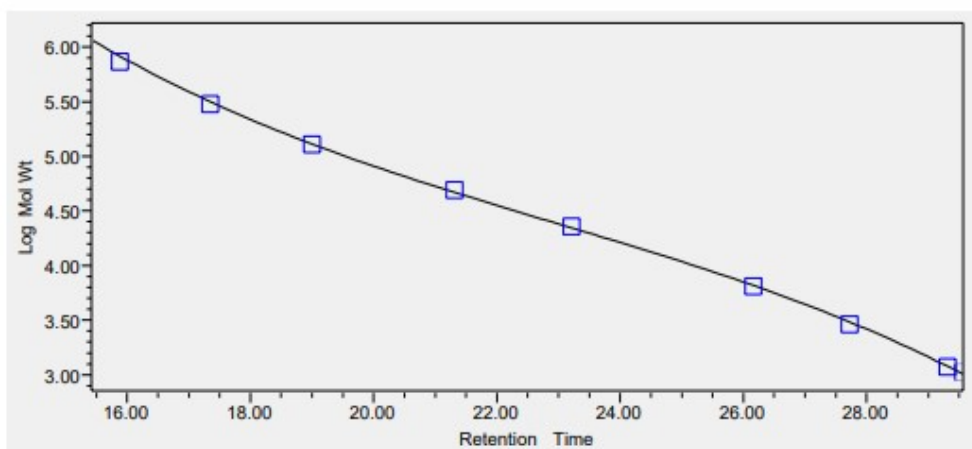

**Supplementary Figure S4.(a)** Gel permeation chromatography (GPC) molecular weight ( $M_w$ ) of the copolymer **BT-NDI**

## SAMPLE INFORMATION

|              |               |                   |                          |
|--------------|---------------|-------------------|--------------------------|
| Sample Name: | BT-PDI        | Acquired By:      | System                   |
| Sample Type: | Broad Unknown | Sample Set Name:  | 240229                   |
| Vial:        | 23            | Acq. Method Set:  | Test                     |
| Injection #: | 1             | Injection Volume: | 100.00 ul                |
| Run Time:    | 50.0 Minutes  | Date Acquired:    | 3/1/2024 10:27:13 AM KST |

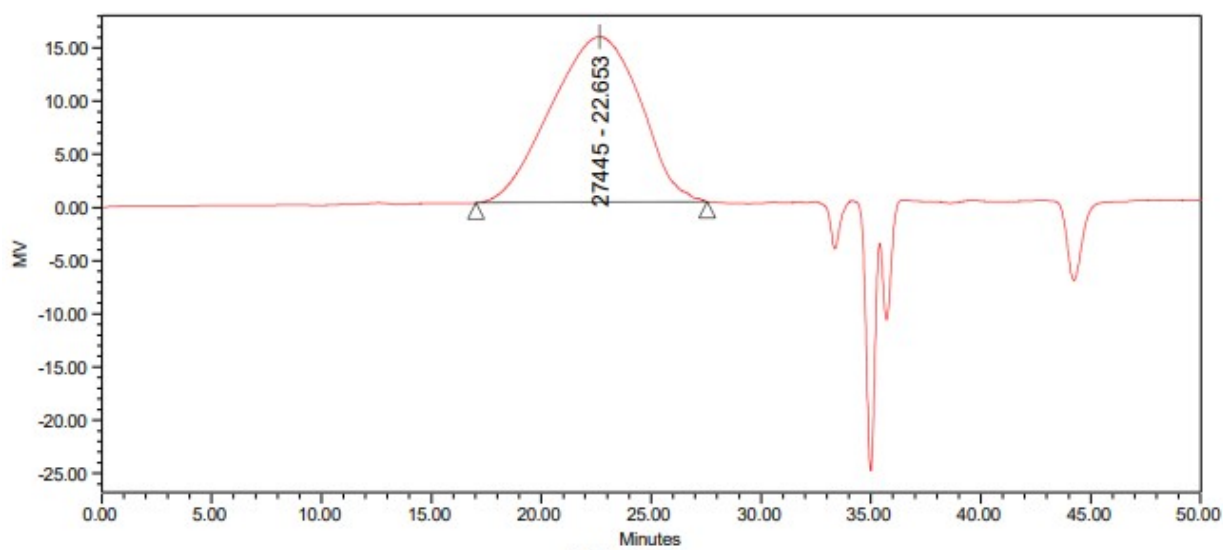

GPC Results

| Dist Name | Retention Time (min) | % Area | % Height | Mn    | Mw    | MP    | Polydispersity |
|-----------|----------------------|--------|----------|-------|-------|-------|----------------|
| 1         | 22.653               | 100.00 | 100.00   | 23745 | 39547 | 27445 | 1.665483       |

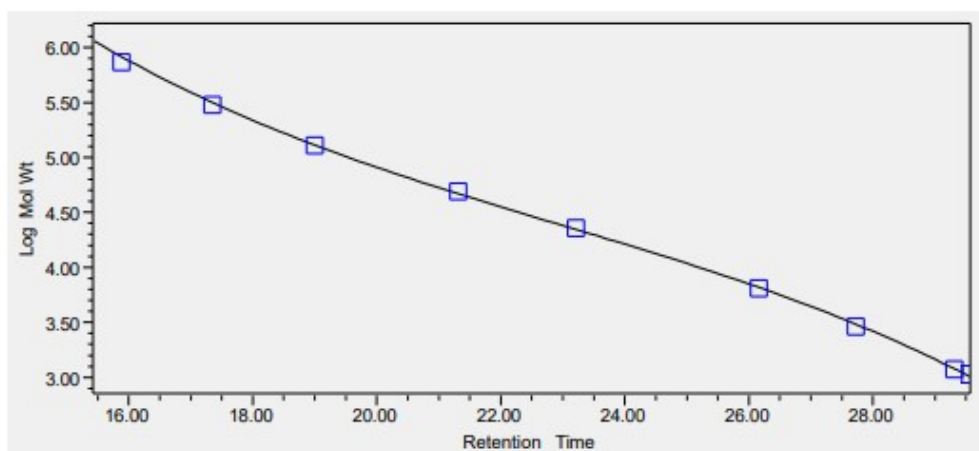

**Supplementary Figure S4.(b)** Gel permeation chromatography (GPC) molecular weight ( $M_w$ ) of the copolymer **BT-PDI**



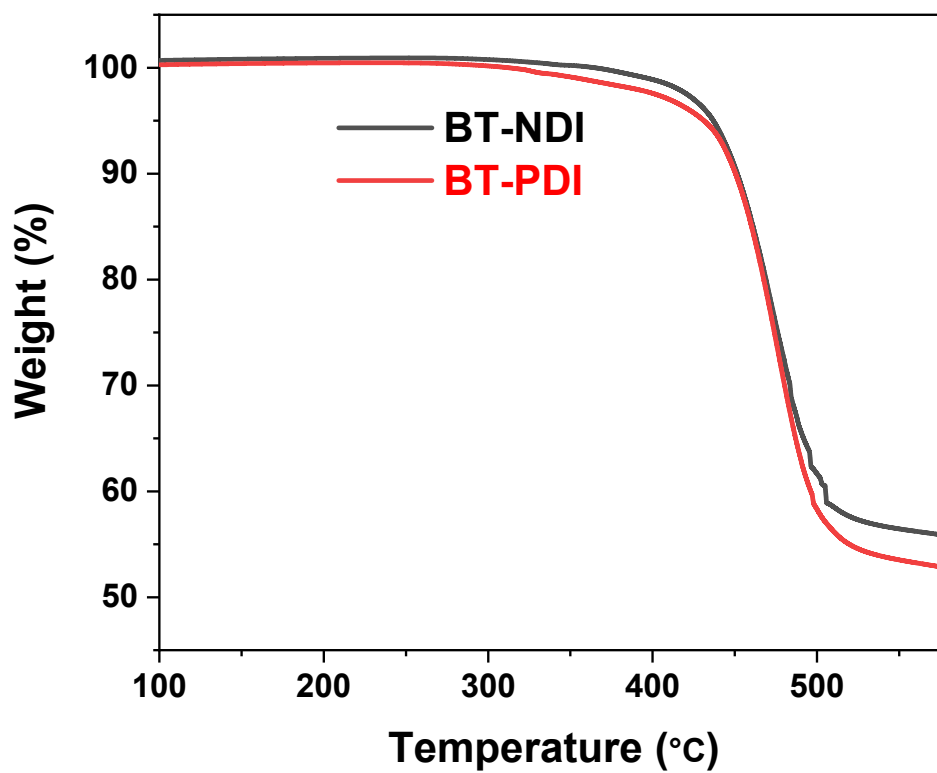

Supplementary Figure S5. TGA thermograms of copolymers **BT-NDI**, and **BT-PDI** under N<sub>2</sub> flow at 10 °C min<sup>-1</sup>.

**Supplementary Table T1.** Summary of literature survey on similar types of n-type polymer based supercapacitor materials (3-electrode system)

| Electrode              | Electrolyte                                 | Operating Voltage | Current Density / Scan Rate | Specific Capacitance        | Cyclic Stability (%)                              | Reference - Year  |
|------------------------|---------------------------------------------|-------------------|-----------------------------|-----------------------------|---------------------------------------------------|-------------------|
| rGO-NDI                | 1 M H <sub>2</sub> SO <sub>4</sub>          | -0.5 to 0.5       | 5 mV s <sup>-1</sup>        | 354 F g <sup>-1</sup>       | -                                                 | 25 - 2021         |
| rGO/NDI-CN             | 1 M H <sub>2</sub> SO <sub>4</sub>          | 0 to 1.2          | 0.5 A g <sup>-1</sup>       | 336 F g <sup>-1</sup>       | 10000 cycles<br>80% @ 10 A g <sup>-1</sup>        | 26 - 2022         |
| P(PDI-alt-BDT)         | 1 M LiClO <sub>4</sub> /propylene carbonate | -1 to 1           | 0.5 Ag <sup>-1</sup>        | 113 F g <sup>-1</sup>       | -                                                 | 27 - 2019         |
| PEDOT/PDI              | 0.1 M TBAPF <sub>6</sub>                    | 0 to 1            | 0.5 Ag <sup>-1</sup>        | 78.6 F g <sup>-1</sup>      | 1000 cycles (80%)                                 | 28 - 2020         |
|                        |                                             | 0 to -1           |                             | 73.1 F g <sup>-1</sup>      |                                                   |                   |
| NDI-Th/GF              | 1 M H <sub>2</sub> SO <sub>4</sub>          | -0.2 to 1         | 0.5 Ag <sup>-1</sup>        | 173.33 F g <sup>-1</sup>    | 3000 cycles<br>82% @ 2 A g <sup>-1</sup>          | 29 - 2024         |
| P(NDI2OD-OTHPV) (DHRP) | 0.5 M H <sub>2</sub> SO <sub>4</sub>        | -0.7 to 0.5       | 0.5 A g <sup>-1</sup>       | 124 F g <sup>-1</sup>       | 5000 cycles<br>100% @ 5 A g <sup>-1</sup>         | 42 - 2018         |
| <b>BT-PDI</b>          | <b>0.1 M TBAPF<sub>6</sub></b>              | <b>-1.5 to 0</b>  | <b>1 A g<sup>-1</sup></b>   | <b>196 F g<sup>-1</sup></b> | <b>5000 Cycles<br/>76.2% @ 5 A g<sup>-1</sup></b> | <b>This study</b> |

## Supplementary Table T2.

(a) Distribution of individual elements (Wt% and Atomic %) from HRTEM EDS

Project 1

19/05/2023

| Map Sum Spectrum |           |          |               |                       |        |           |          |
|------------------|-----------|----------|---------------|-----------------------|--------|-----------|----------|
| Element          | Line Type | k Factor | k Factor type | Absorption Correction | Wt%    | Wt% Sigma | Atomic % |
| C                | K series  | 2.512    | Theoretical   | 1.00                  | 83.31  | 0.70      | 88.75    |
| N                | K series  | 3.166    | Theoretical   | 1.00                  | 4.30   | 0.69      | 3.93     |
| O                | K series  | 1.869    | Theoretical   | 1.00                  | 5.93   | 0.30      | 4.75     |
| S                | K series  | 0.959    | Theoretical   | 1.00                  | 6.45   | 0.21      | 2.58     |
| Total:           |           |          |               |                       | 100.00 |           | 100.00   |

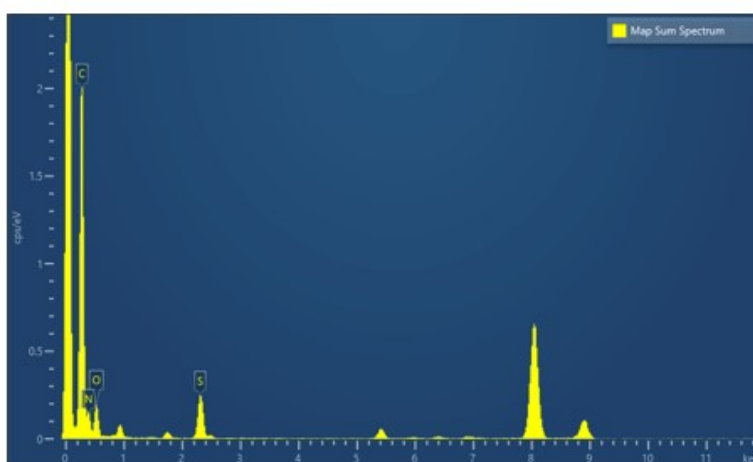

OXFORD  
INSTRUMENTS  
*The Business of Science®*

(b) Comparison of distribution of individual elements (Atomic %) from HRTEM EDS and Calculation

|                                    |            | C       | N      | O      | S      | H      |
|------------------------------------|------------|---------|--------|--------|--------|--------|
| BT-PDI<br>$C_{88}H_{116}N_4O_4S_3$ | From EDS   | 88.75 % | 3.93 % | 4.75 % | 2.58 % |        |
|                                    | Calculated | 76.03 % | 4.03 % | 4.6 %  | 6.92 % | 8.41 % |

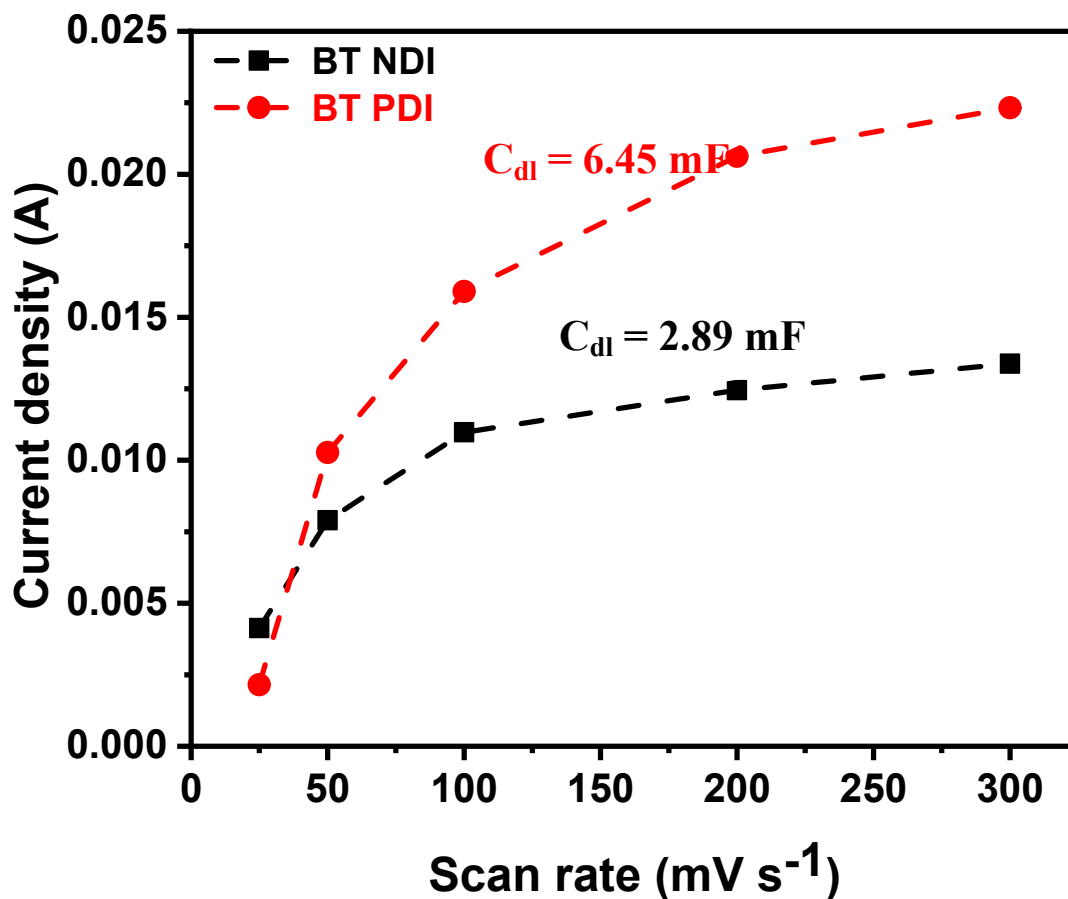

**Supplementary Figure S6.** The  $C_{dl}$  values for ECSA study, showing the corresponding linear fits of **BT-NDI** and **BT-PDI** in the range of 0 to -0.1 V CV.

The electrochemical double-layer capacitance ( $C_{dl}$ ) for the working electrodes was characterized to calculate electrochemically active surface area (ECSA), determining the active redox reaction region. The  $C_{dl}$  of **BT-PDI** is 6.45 mF, which is higher than that of **BT-NDI** electrode (2.89 mF), indicating the presence of numerous beneficial active sites at the electrode-electrolyte interfaces, which enable the electrode to achieve better supercapacitive performance. The ECSA values for **BT-NDI** and **BT-PDI** was calculated to be 72.25 and 161.46 cm<sup>2</sup>, respectively using following equation.<sup>[S13]</sup>

$$ECSA = C_{dl}/C_s \quad (S5)$$

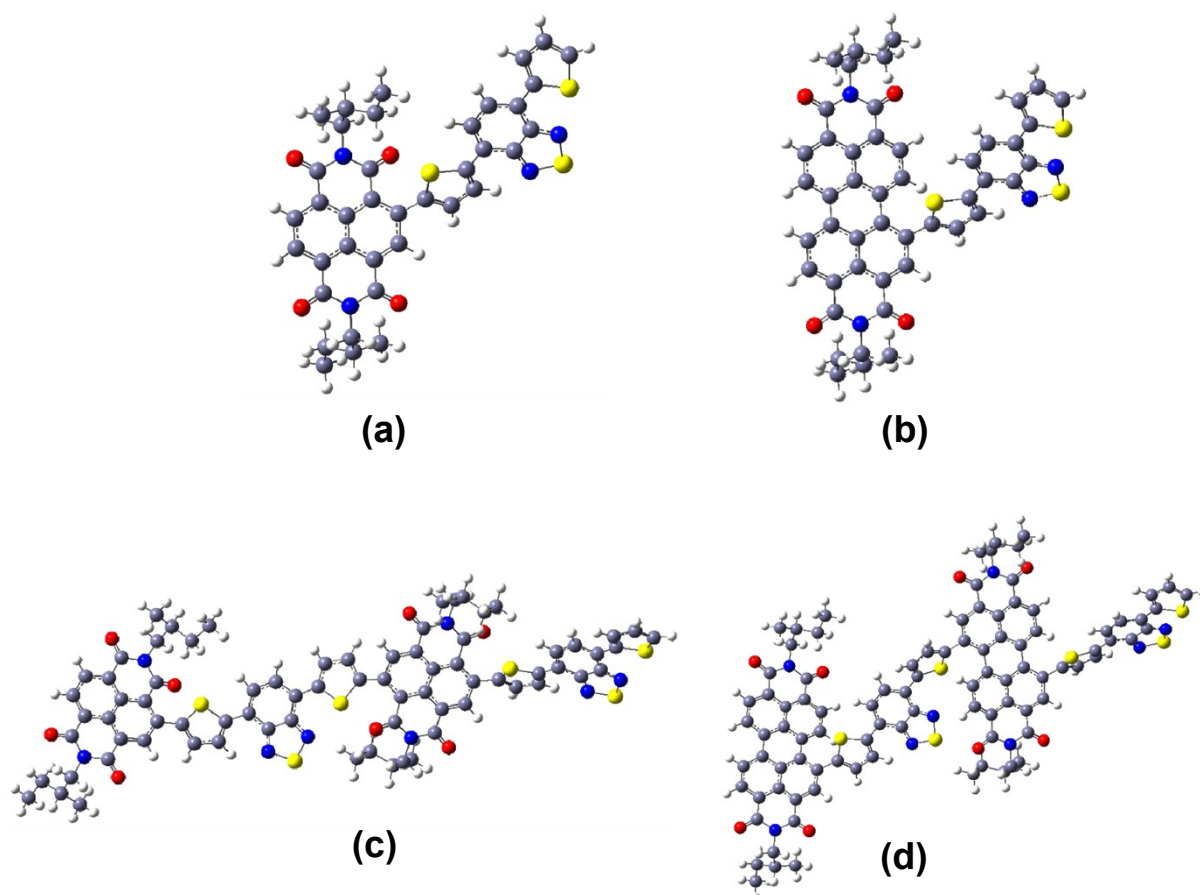

**Supplementary Figure S7.** The geometry-optimized structures of **BT-NDI** in (a) monomeric and (c) dimeric forms and **BT-PDI** in (b) monomeric and (d) dimeric forms, respectively.

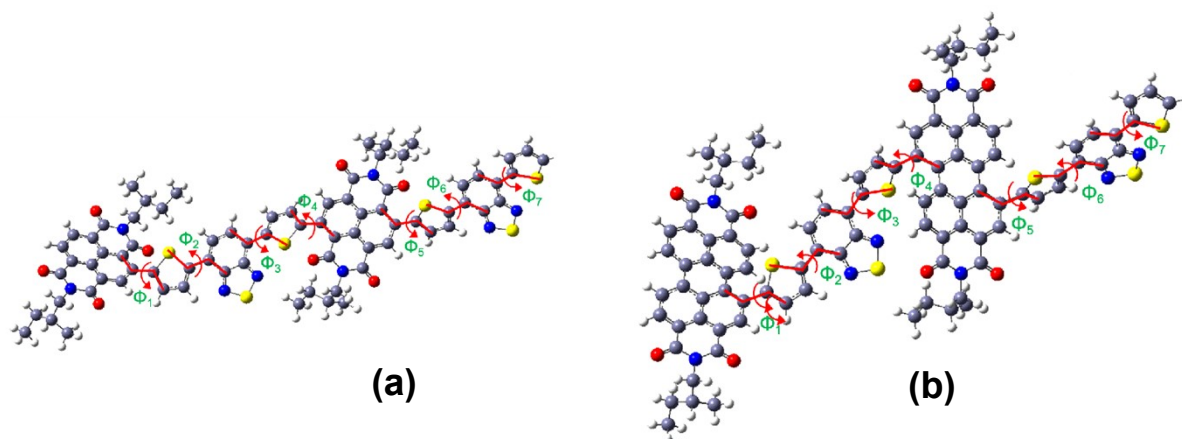

**Supplementary Figure S8.** Dihedral angles of the optimized geometries of (a) **BT-NDI** and (b) **BT-PDI** dimers. The dihedral angles between the junction of BT and NDI/PDI are defined by  $\Phi_1$ ,  $\Phi_4$ , and  $\Phi_5$  respectively. The NDI/PDI moiety remains planar in each monomer of the dimeric structure, while the BT moiety does not exhibit planarity.

**Supplementary Table T3.** Dihedrals of the optimized geometries of (a) **BT-NDI** and (b) **BT-PDI** dimers.

|   | Dihedral<br>(in degree) | <b>BT-NDI</b> | <b>BT-PDI</b> |
|---|-------------------------|---------------|---------------|
| 1 | <b>Φ1</b>               | 135.1         | 130.5         |
| 2 | Φ2                      | 161.8         | 162.4         |
| 3 | Φ3                      | 157.2         | 137.1         |
| 4 | <b>Φ4</b>               | 149.0         | 129.9         |
| 5 | <b>Φ5</b>               | 134.1         | 123.7         |
| 6 | Φ6                      | 162.1         | 163.3         |
| 7 | Φ7                      | 163.0         | 162.0         |

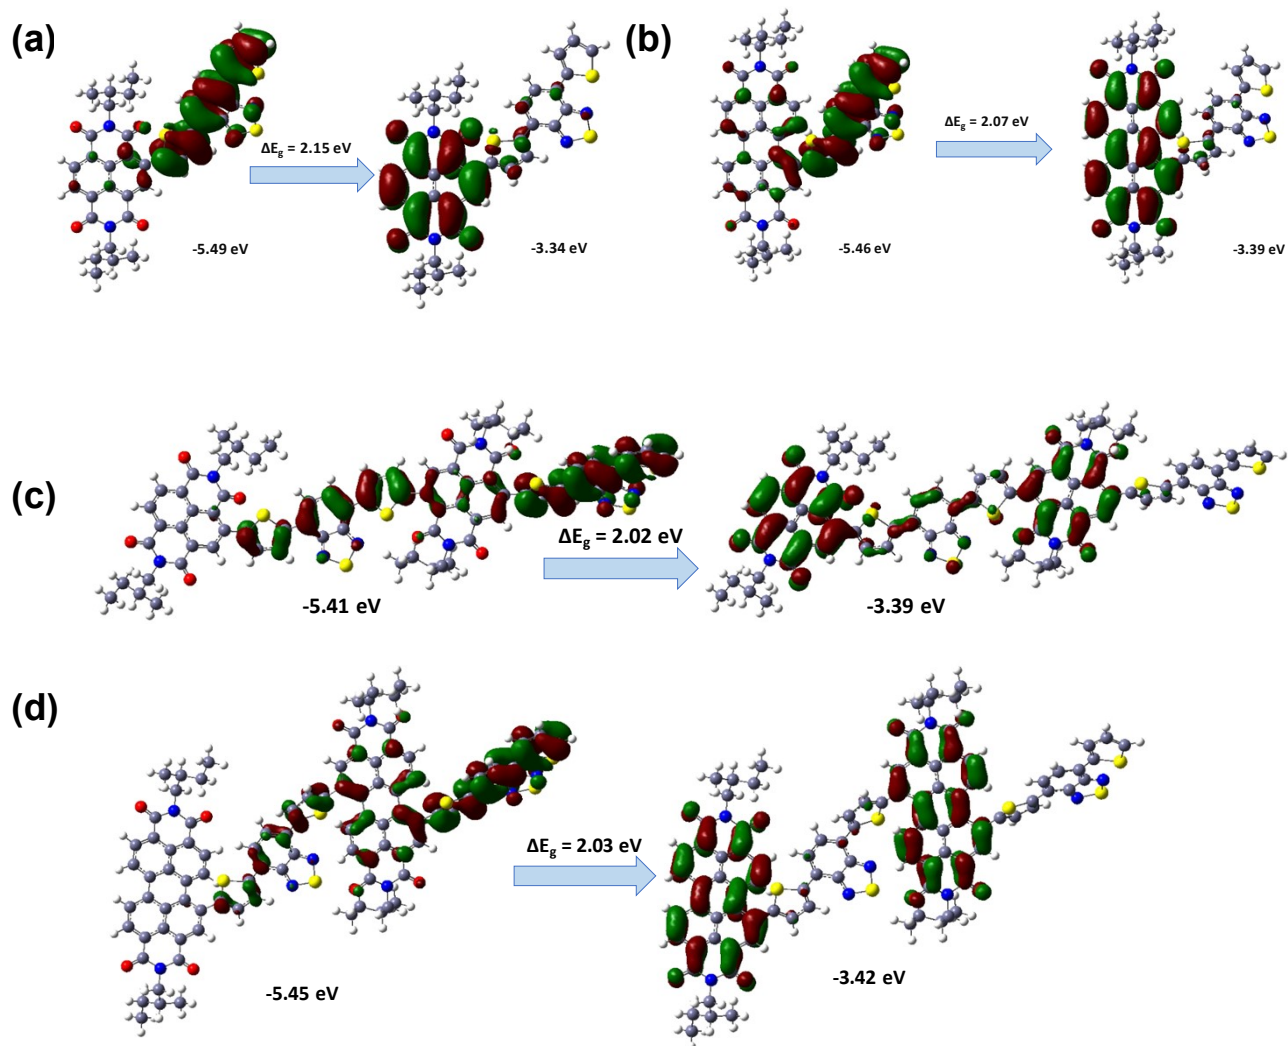

**Supplementary Figure S9.** The HOMO-LUMO energy diagrams of the monomeric units of (a) **BT-NDI** and (b) **BT-PDI** moieties, dimeric units of (c) **BT-NDI** and (d) **BT-PDI** moieties.

**Supplementary Table T4.** The HOMO and LUMO energy levels and the HOMO-LUMO energy gap (eV) for monomer, dimer, and trimer of **BT-NDI** and **BT-PDI**.

| Energies are in eV    | BT-NDI  |       |        | BT-PDI  |       |        |
|-----------------------|---------|-------|--------|---------|-------|--------|
|                       | Monomer | Dimer | Trimer | Monomer | Dimer | Trimer |
| $E_{\text{HOMO}}$     | -5.49   | -5.41 | -5.39  | -5.46   | -5.45 | -5.38  |
| $E_{\text{LUMO}}$     | -3.34   | -3.39 | -3.41  | -3.39   | -3.42 | -3.44  |
| $\Delta E_{\text{g}}$ | 2.15    | 2.02  | 1.98   | 2.07    | 2.03  | 1.94   |



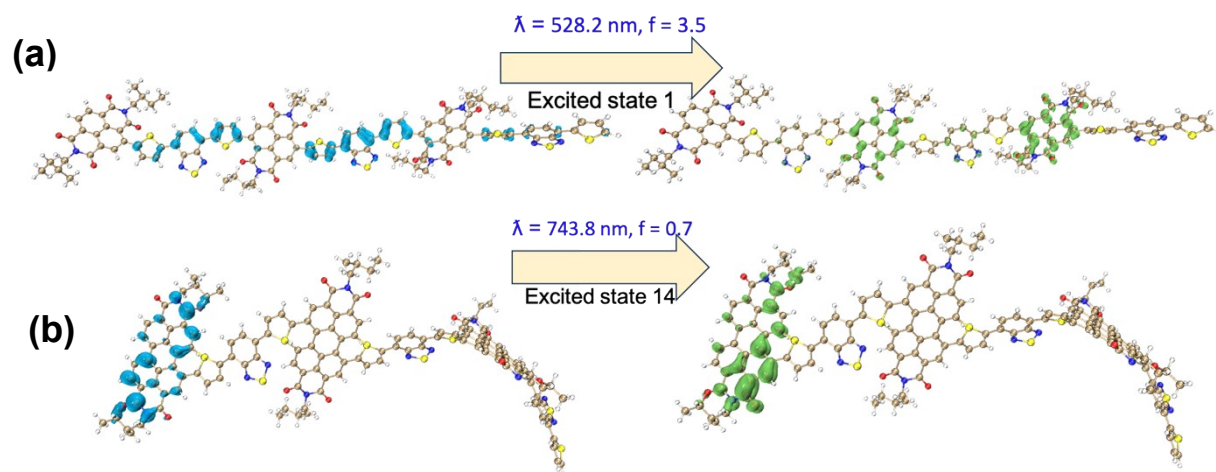

**Supplementary Figure S10.** Natural transition orbitals (NTO) corresponding to the characteristic UV-Vis absorption in the trimeric (a) **BT-NDI** and (b) **BT-PDI**. For each NTO, the hole (represented in blue colour) and electron (represented in green colour) orbitals are given in left and right, respectively. The transition wavelength ( $\lambda_{\max}$ ) and the highest oscillator strength (f) for each transition are mentioned in the figure.

**Supplementary Table T5.** The absorption maxima ( $\lambda_{\max}$ ) corresponds to the characteristic UV-Vis absorption calculated from the TD-DFT method for the monomer, dimer, and trimer of **BT-NDI** and **BT-PDI**.

| Absorption maxima<br>( $\lambda_{\max}$ ) | Monomer    | Dimer      | Trimer  |
|-------------------------------------------|------------|------------|---------|
| <b>BT-NDI</b>                             | 290-474 nm | 317-517 nm | 316-528 |
| <b>BT-PDI</b>                             | 291-522 nm | 306-542 nm | 497-744 |

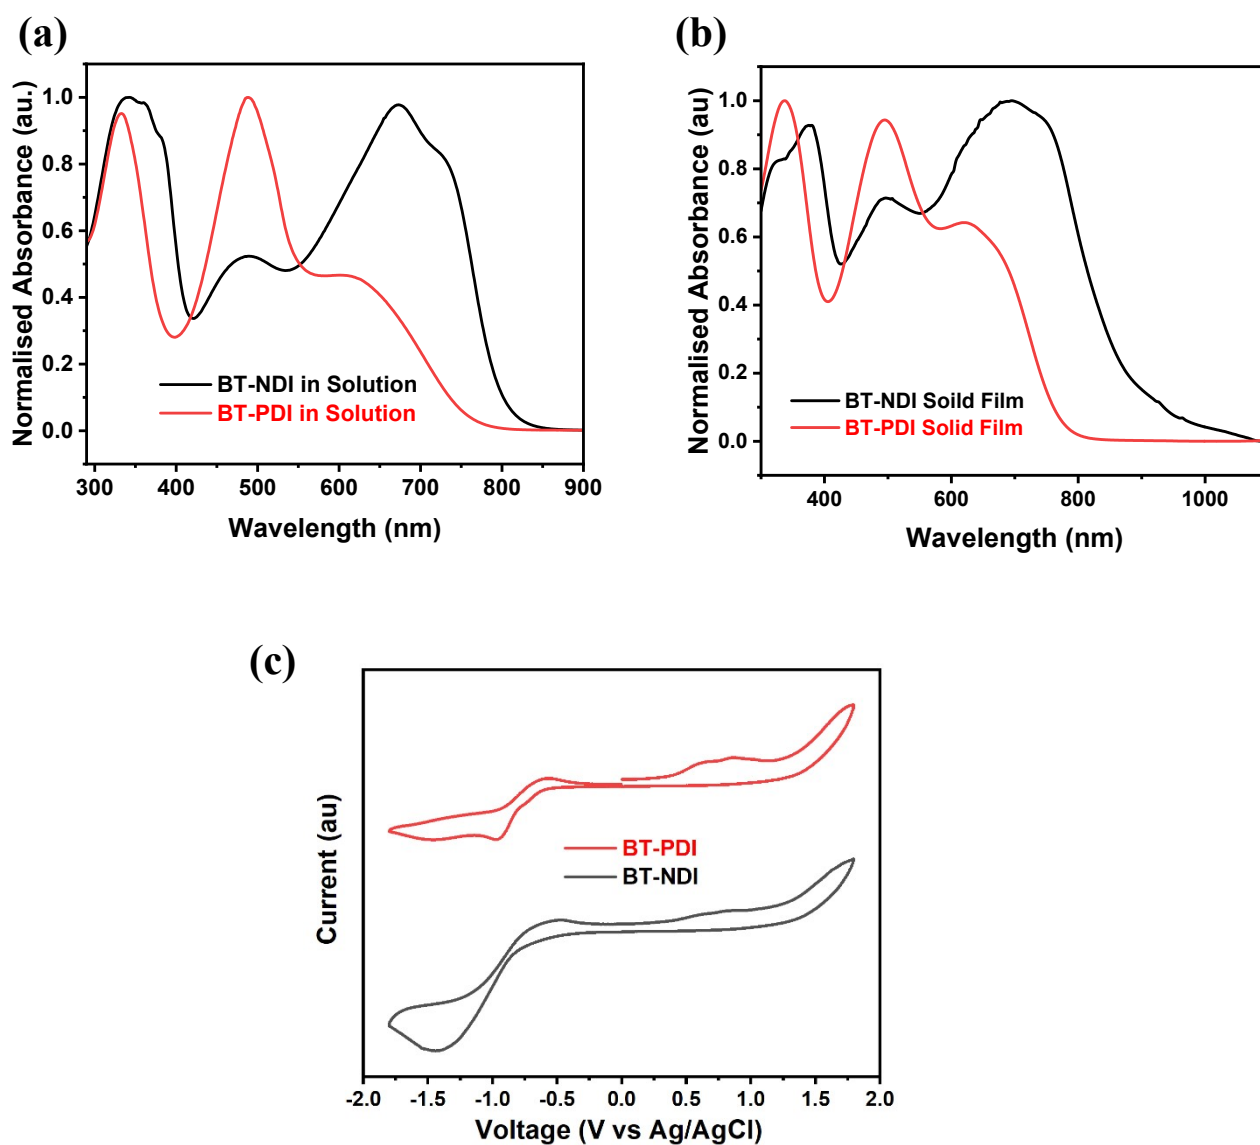

**Supplementary Figure S11.** Normalized UV-vis absorption spectra of **BT-NDI** and **BT-PDI**: (a) in a diluted chlorobenzene solution and (b) confined in thin films on glass substrates at room temperature. Cyclic voltammograms of **BT-NDI**, and **BT-PDI** in thin films (scan rate: 100 mV s<sup>-1</sup>)

**Supplementary Table T6.** Optical and electrochemical properties of **BT-NDI** and **BT-PDI**.

| Semiconducting Polymer | <sup>a</sup> $\lambda_{\max}^{\text{sol}}$<br>(nm) | <sup>b</sup> $\lambda_{\max}^{\text{Film}}$<br>(nm) | <sup>c</sup> HOMO<br>(eV) | <sup>c</sup> LUMO<br>(eV) | <sup>d</sup> $E_g^{\text{opt}}$<br>(eV) | <sup>e</sup> $E_g^{\text{ec}}$<br>(eV) |
|------------------------|----------------------------------------------------|-----------------------------------------------------|---------------------------|---------------------------|-----------------------------------------|----------------------------------------|
| <b>BT-NDI</b>          | 341, 486, 676                                      | 367, 486, 681                                       | -5.88                     | -3.77                     | 1.41                                    | 2.11                                   |
| <b>BT-PDI</b>          | 332, 491, 614                                      | 335, 496, 619                                       | -5.80                     | -3.68                     | 1.58                                    | 2.12                                   |

<sup>a</sup>Absorbance of copolymers in dilute chlorobenzene solution. <sup>b</sup>Spin-coated films of copolymers in chlorobenzene solution on glass surfaces. <sup>c</sup> $E_{\text{HOMO}}/E_{\text{LUMO}} = [-(E_{\text{onset}} - E_{\text{onset}}(\text{Fc}/\text{Fc}^+ \text{ vs. Ag}/\text{Ag}^+)) - 4.8]$  eV, where 4.8 eV is the energy level of ferrocene below the vacuum level, and the formal potential,  $E_{\text{onset}}(\text{Fc}/\text{Fc}^+ \text{ vs. Ag}/\text{Ag}^+)$ , is equal to 0.45 V. <sup>d</sup>Electrochemical band gap:  $E_g^{\text{ec}} = E_{\text{ox/onset}} - E_{\text{red/onset}}$ . Optical band gap:  $E_g^{\text{opt}} = 1240/\lambda_{\text{edge}}$ .

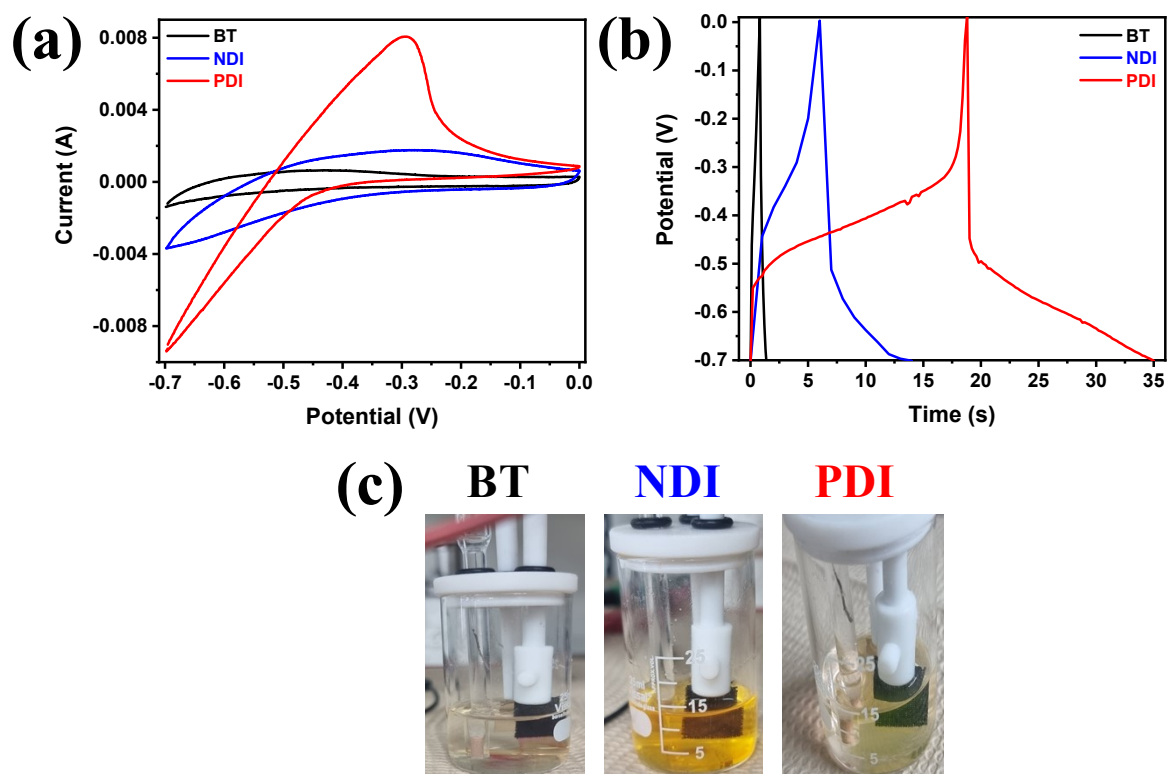

**Supplementary Figure S12.** (a) CV at 100 mV s<sup>-1</sup> scan rate, (b) GCD at 1 A g<sup>-1</sup> current density for the individual monomer units of BT, NDI and PDI, (c) Effect of applied current/potential on the monomeric working electrodes.

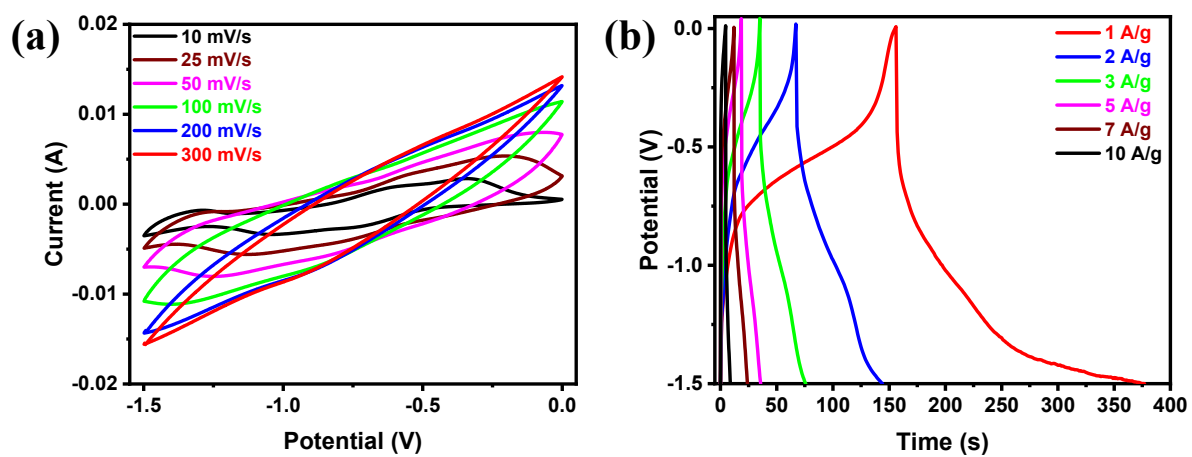

**Supplementary Figure S13.** (a) CV curves at different scan rates and (b) GCD curves at varying current densities for the **BT-NDI** polymeric electrode

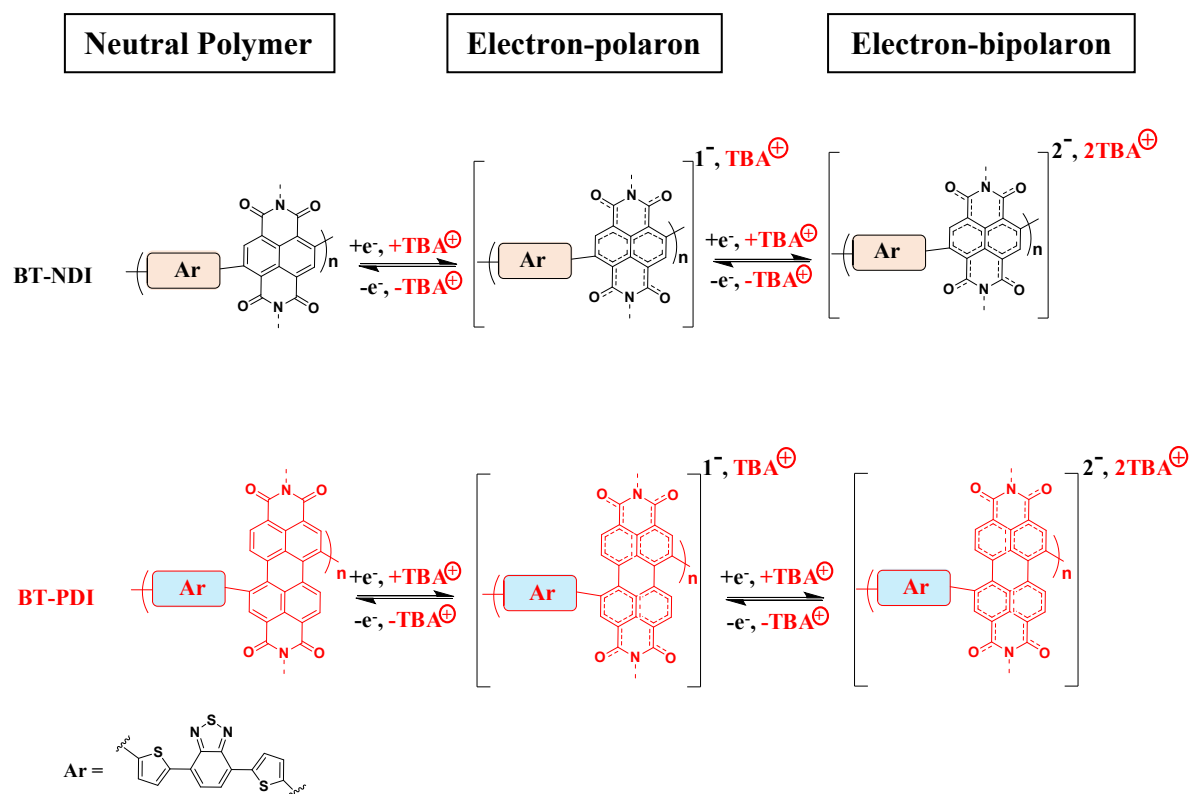

**Supplementary Figure S14.** Proposed plausible pseudocapacitive charge storage mechanism in the **BT-NDI** and **BT-PDI** conjugated polymers based on the reversible two consecutive one-electron reduction processes to form electron-polaron and electron-bipolaron.<sup>[S14-S15]</sup>

- (S1) S. Sharma, R. Soni, S. Kurungot, S. K. Asha, *J. Phys. Chem. C* **2019**, *123*, 2084–2093.
- (S2) Z. Chen, Y. Zheng, H. Yan, A. Facchetti, *J. Am. Chem. Soc.* **2009**, *131*, 8–9.
- (S3) D. Patra, X. Zhan, R. Linthoinganbi, S. Muduli, S. Mishra, Y. Liu, S. Park, *J. Mater. Chem. C* **2023**, *11*, 1457–1463.
- (S4) A. D. Becke, *J. Chem. Phys.* **1993**, *98*, 5648.
- (S5) W. J. Hehre, R. Ditchfield, J. A. Pople, *J. Chem. Phys.* **1972**, *56*, 2257.
- (S6) R. Ditchfield, W. J. Hehre, J. A. Pople, *J. Chem. Phys.* **1971**, *54*, 724.
- (S7) L. A. Burns, Á. V.-Mayagoitia, B. G. Sumpter, C. D. Sherrill, *J. Chem. Phys.* **2011**, *134*, 084107.
- (S8) T. Yanai, D. P. Tew, N. C. Handy, *Chem. Phys. Lett.* **2004**, *393*, 51-57.
- (S9) M. J. Frisch, et al., Gaussian 09, *Gaussian, Inc., Wallingford CT*, **2016**.
- (S10) T. Lu, F. Chen, *J. Comp. Chem.*, **2012**, 580-592.
- (S11) W. Humphery, A. Dalke, K. Schulten, *J. Mol. Graph.* **1996**, *14*, 33-8, 27-8.
- (S12) Z. Zhao, Z. Yin, H. Chen, L. Zheng, C. Zhu, L. Zhang, S. Tan, H. Wang, Y. Guo, Q. Tang, Y. Liu *Advanced Materials* **2017**, *29*, 1602410.
- (S13) C. C. L. McCrory, S. Jung, J. C. Peters, T. F. Jaramillo, *Journal of the American Chemical Society* **2013**, *135*, 16977–16987.
- (S14) A. A. Szumska et al., *Journal of the American Chemical Society* **2021**, *143*, 14795–14805.
- (S15) Y. Cho, D. Jang, J. -J. Park, H. Kye, J. E. Kwon., B. -G. Kim, *ACS Appl. Energy Mater.*, **2023**.
